# Supplementary material for: Identification of SCRG1 as a Potential Therapeutic Target for Human Synovial Inflammation
Source: Front Immunol. 2022 May 26;13:893301. doi: 10.3389/fimmu.2022.893301 (PMC9204521; doi:10.3389/fimmu.2022.893301)
Supplement: Supplementary file 3 [file Table_2.xlsx]

## Sheet: Table S2
Table S2. The candidate drugs list by 6 DEGs.
Index	Term	P-value	Adjusted P-value	Odds Ratio	Combined Score	Genes
1	VALPROIC ACID CTD 00006977	0.00213835	0.0400711	81816	502982	CDKN1A;STMN2;FOSB;SLC2A3;TAC1;SCRG1
2	Tetradioxin CTD 00006848	0.00353945	0.0400711	10.7826	60.8548	CDKN1A;STMN2;FOSB;SLC2A3;TAC1
3	estradiol CTD 00005920	0.00675176	0.0400711	9.04064	45.1847	CDKN1A;STMN2;FOSB;SLC2A3;TAC1
4	benzopyrene CTD 00005488	0.00739947	0.0400711	8.81082	43.2289	CDKN1A;STMN2;FOSB;SLC2A3;TAC1
5	Retinoic acid CTD 00006918	0.00621431	0.0400711	9.25229	47.01	CDKN1A;FOSB;SLC2A3;SCRG1
6	Silica CTD 00006678	0.00012673	0.0105413	28.4847	255.606	CDKN1A;FOSB;TAC1;SCRG1
7	trichostatin A CTD 00000660	0.0227477	0.0483547	6.11285	23.1267	CDKN1A;STMN2;SLC2A3;SCRG1
8	acetaminophen CTD 00005295	0.0373356	0.0620224	5.11966	16.8325	CDKN1A;FOSB;SLC2A3;TAC1
9	arsenite CTD 00000779	0.000530425	0.0180639	19.2356	145.072	STMN2;FOSB;TAC1
10	ciclopirox HL60 UP	2.32368e-05	0.0105413	85.4267	911.484	CDKN1A;FOSB;SLC2A3
11	8-Bromo-cAMP, Na CTD 00007044	0.00109414	0.0279462	22.3544	152.407	CDKN1A;TAC1;SCRG1
12	Arsenenous acid CTD 00000922	0.00758012	0.0400711	10.9646	53.5319	CDKN1A;FOSB;SLC2A3
13	ZINC CTD 00007011	0.0150279	0.0420603	8.39872	35.2565	CDKN1A;FOSB;SLC2A3
14	progesterone CTD 00006624	0.022837	0.0483547	7.09244	26.805	CDKN1A;STMN2;FOSB
15	(-)-Epigallocatechin gallate CTD 00002033	0.0297672	0.055463	6.35315	22.3272	CDKN1A;FOSB;SLC2A3
16	cyclosporin A CTD 00007121	0.225613	0.239502	2.35965	3.51336	CDKN1A;SLC2A3;TAC1
17	Phorbol 12-myristate 13-acetate CTD 00006852	0.000455688	0.0164316	30.4891	234.574	CDKN1A;FOSB
18	Decitabine CTD 00000750	0.019312	0.0456553	7.59432	29.975	CDKN1A;STMN2
19	Copper sulfate CTD 00007279	0.354735	0.364242	1.74372	1.80717	CDKN1A;FOSB
20	Quinine CTD 00006682	6.95235e-05	0.0105413	228.091	2183.71	CDKN1A;SLC2A3
21	thioridazine CTD 00006879	0.000122517	0.0105413	169.753	1529.01	CDKN1A;SLC2A3
22	p-Phenylenediamine CTD 00001400	0.00014896	0.0105413	153.392	1351.67	CDKN1A;SLC2A3
23	cadmium acetate CTD 00001325	0.00014896	0.0105413	153.392	1351.67	CDKN1A;FOSB
24	ethaverine HL60 DOWN	0.00014896	0.0105413	153.392	1351.67	CDKN1A;SLC2A3
25	2,4-Dinitrofluorobenzene CTD 00005849	0.00014896	0.0105413	153.392	1351.67	FOSB;SLC2A3
26	Chromium(III) oxide CTD 00001091	0.000196581	0.0105413	132.887	1134.11	CDKN1A;SLC2A3
27	dequalinium chloride HL60 DOWN	0.000202992	0.0105413	130.702	1111.27	CDKN1A;SLC2A3
28	Chromium(II) chloride CTD 00000877	0.000229655	0.0105413	122.634	1027.54	CDKN1A;SLC2A3
29	histamine CTD 00006100	0.000236575	0.0105413	120.77	1008.34	CDKN1A;TAC1
30	170449-18-0 CTD 00003361	0.000250719	0.0105413	117.206	971.775	CDKN1A;TAC1
31	mephentermine HL60 UP	0.000250719	0.0105413	117.206	971.775	CDKN1A;SLC2A3
32	fluoxetine CTD 00005988	0.000257944	0.0105413	115.501	954.362	CDKN1A;SLC2A3
33	Lead(II) acetate CTD 00000394	0.000361064	0.0138333	97.1268	769.871	CDKN1A;SLC2A3
34	Pioglitazone CTD 00002515	0.000629487	0.0199919	72.9688	537.824	CDKN1A;SLC2A3
35	menadione PC3 UP	0.000652263	0.0199919	71.6468	525.534	CDKN1A;FOSB
36	1,4-chrysenequinone PC3 UP	0.00072297	0.0204826	67.9521	491.44	CDKN1A;FOSB
37	luteolin CTD 00007430	0.000735101	0.0204826	67.3729	486.129	CDKN1A;FOSB
38	Oxazolone CTD 00006449	0.000861841	0.0229699	62.0781	438.051	FOSB;SLC2A3
39	parthenolide PC3 UP	0.00208183	0.0400711	39.3871	243.196	CDKN1A;FOSB
40	Capsaicin CTD 00005570	0.00214289	0.0400711	38.802	238.461	CDKN1A;TAC1
41	camptothecin MCF7 UP	0.00248292	0.0400711	35.9509	215.645	CDKN1A;FOSB
42	gemcitabine CTD 00002382	0.00277688	0.0400711	33.9227	199.684	CDKN1A;SLC2A3
43	1-chloro-2,4-dinitrobenzene CTD 00005848	0.00294169	0.0400711	32.9217	191.893	CDKN1A;SLC2A3
44	Uranium acetate CTD 00000229	0.00296561	0.0400711	32.7834	190.822	STMN2;SLC2A3
45	URANIUM CTD 00006964	0.00303791	0.0400711	32.3754	187.667	STMN2;SLC2A3
46	8-azaguanine PC3 UP	0.00517527	0.0400711	24.5134	129.035	CDKN1A;FOSB
47	helveticoside PC3 UP	0.00520654	0.0400711	24.436	128.481	CDKN1A;FOSB
48	menadione HL60 UP	0.00552414	0.0400711	23.688	123.145	CDKN1A;FOSB
49	mifepristone CTD 00007083	0.00552414	0.0400711	23.688	123.145	CDKN1A;STMN2
50	indomethacin CTD 00006147	0.00555639	0.0400711	23.6156	122.631	CDKN1A;SCRG1
51	mebendazole HL60 UP	0.00591692	0.0400711	22.8477	117.207	CDKN1A;SLC2A3
52	nocodazole HL60 UP	0.00684678	0.0400711	21.1558	105.44	CDKN1A;SLC2A3
53	3'-Azido-3'-deoxythymidine CTD 00007047	0.00688244	0.0400711	21.0978	105.042	CDKN1A;SLC2A3
54	NICKEL CHLORIDE CTD 00001064	0.00780184	0.0400711	19.7441	95.8258	CDKN1A;SLC2A3
55	Dronabinol CTD 00006853	0.00791576	0.0400711	19.593	94.8086	CDKN1A;FOSB
56	rosiglitazone CTD 00003139	0.00826213	0.0400711	19.1531	91.8594	CDKN1A;SLC2A3
57	lanatoside C PC3 UP	0.00826213	0.0400711	19.1531	91.8594	CDKN1A;FOSB
58	8-azaguanine HL60 UP	0.0089351	0.0400711	18.3728	86.6785	CDKN1A;FOSB
59	carmustine CTD 00005595	0.00897544	0.0400711	18.3288	86.3885	CDKN1A;TAC1
60	camptothecin PC3 UP	0.00930121	0.0400711	17.9844	84.1239	CDKN1A;FOSB
61	strophanthidin PC3 UP	0.0102246	0.0401666	17.0993	78.3656	CDKN1A;FOSB
62	Cylindrospermopsin CTD 00003136	0.0112775	0.0401666	16.2262	72.7737	CDKN1A;FOSB
63	digitoxigenin PC3 UP	0.0112775	0.0401666	16.2262	72.7737	CDKN1A;FOSB
64	digoxin PC3 UP	0.0112775	0.0401666	16.2262	72.7737	CDKN1A;FOSB
65	3-(1-methylpyrrolidin-2-yl)pyridine CTD 00006393	0.0120055	0.0401666	15.6909	69.3915	CDKN1A;FOSB
66	cephaeline PC3 UP	0.0127068	0.0409095	15.2195	66.4427	CDKN1A;FOSB
67	oxygen CTD 00006454	0.0131843	0.040948	14.9203	64.5859	CDKN1A;SLC2A3
68	Tamibarotene CTD 00002527	0.0149181	0.0420603	13.9576	58.6943	CDKN1A;FOSB
69	aspirin CTD 00005447	0.0150201	0.0420603	13.9063	58.3835	CDKN1A;FOSB
70	Irinotecan hydrochloride CTD 00002224	0.015225	0.0420603	13.8046	57.7698	CDKN1A;FOSB
71	NICKEL SULFATE CTD 00001417	0.0157949	0.0425987	13.5324	56.1333	CDKN1A;SLC2A3
72	4-Hydroxytamoxifen CTD 00000850	0.0163211	0.0425987	13.2938	54.7081	CDKN1A;FOSB
73	cytarabine CTD 00005743	0.0167476	0.0425987	13.1088	53.6084	CDKN1A;TAC1
74	benzene CTD 00005481	0.0178904	0.044221	12.646	50.8811	CDKN1A;FOSB
75	amiodarone CTD 00005381	0.0184463	0.0448714	12.4366	49.658	FOSB;SLC2A3
76	troglitazone CTD 00002415	0.0199268	0.0460369	11.9223	46.6842	CDKN1A;SLC2A3
77	raloxifene CTD 00007367	0.0219987	0.0482341	11.2918	43.0983	CDKN1A;SLC2A3
78	Vitinoin CTD 00007069	0.0279982	0.0536602	9.87918	35.3241	CDKN1A;FOSB
79	tamoxifen CTD 00006827	0.0294912	0.0554543	9.5965	33.8148	CDKN1A;SLC2A3
80	Caspan CTD 00000180	0.0299041	0.0555491	9.52208	33.4202	STMN2;SLC2A3
81	lycorine HL60 UP	0.0337283	0.0592065	8.89907	30.1627	CDKN1A;FOSB
82	Demecolcine CTD 00005762	0.0347511	0.0599234	8.75011	29.3964	CDKN1A;SLC2A3
83	Bortezomib CTD 00003736	0.0348983	0.0599234	8.72922	29.2893	CDKN1A;SLC2A3
84	anisomycin PC3 UP	0.0364589	0.0611668	8.5155	28.1997	CDKN1A;FOSB
85	CADMIUM CTD 00005555	0.0564735	0.0808837	6.61509	19.0117	CDKN1A;FOSB
86	anisomycin HL60 UP	0.0564735	0.0808837	6.61509	19.0117	CDKN1A;FOSB
87	5-Fluorouracil CTD 00005987	0.0619322	0.0862829	6.26433	17.4256	CDKN1A;SLC2A3
88	TERT-BUTYL HYDROPEROXIDE CTD 00007349	0.0752906	0.0999572	5.57252	14.4128	CDKN1A;SLC2A3
89	SELENIUM CTD 00006731	0.0980586	0.120703	4.73629	10.9986	CDKN1A;SCRG1
90	resveratrol CTD 00002483	0.102676	0.124143	4.60138	10.4735	CDKN1A;SLC2A3
91	POTASSIUM CHROMATE CTD 00001284	0.137047	0.156442	3.82016	7.59231	FOSB;SLC2A3
92	calcitriol CTD 00005558	0.144485	0.161918	3.68855	7.13579	CDKN1A;SLC2A3
93	hydrogen peroxide CTD 00006118	0.238098	0.251212	2.59408	3.7227	CDKN1A;FOSB
94	atrazine CTD 00005450	0.278938	0.291293	2.29629	2.93183	CDKN1A;SCRG1
95	AFLATOXIN B1 CTD 00007128	0.294748	0.306238	2.19734	2.68435	CDKN1A;TAC1
96	7646-79-9 CTD 00000928	0.29657	0.30761	2.18642	2.65753	CDKN1A;SLC2A3
97	quercetin CTD 00006679	0.305552	0.316391	2.13397	2.53011	CDKN1A;SLC2A3
98	formaldehyde CTD 00006001	0.310328	0.320254	2.10696	2.46541	CDKN1A;FOSB
99	parathion CTD 00006472	0.0277303	0.053455	9.9323	35.6096	CDKN1A
100	2-Methylcholine CTD 00002006	0.109957	0.130123	4.40601	9.72698	CDKN1A
